# Supplementary material for: Estimating the prevalence and risk of COVID-19 among international travelers and evacuees of Wuhan through modeling and case reports
Source: PubMed Central journal article supplement (PMC7310725; doi:10.1371/journal.pone.0234955), 2020-06-23
Supplement: pone.0234955.s002.pdf [file pone.0234955.s002.pdf]

## Wuhan Estimated Infected

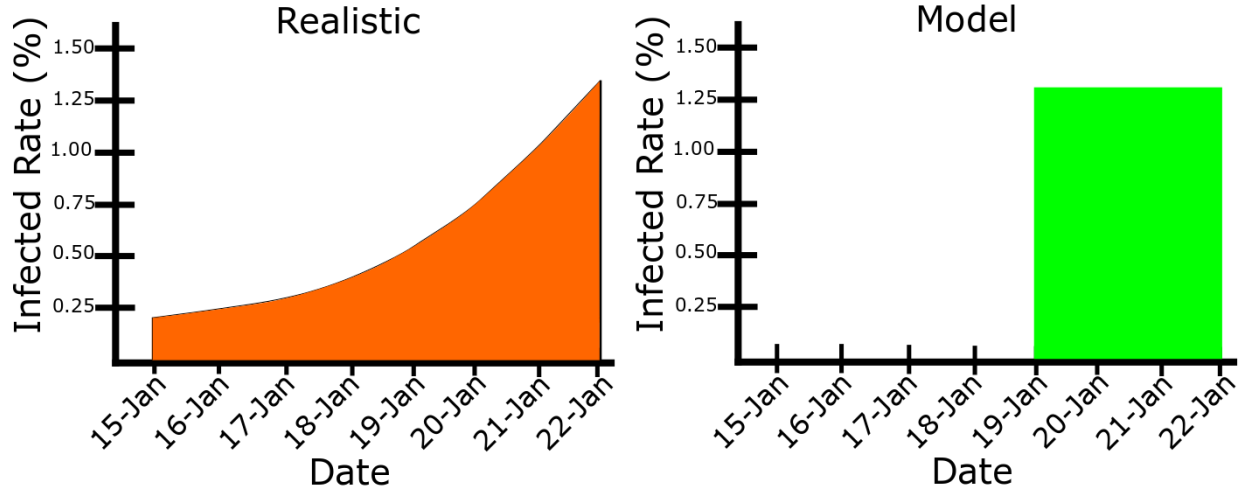

**Fig S1. Realistic vs Model of Wuhan Estimated Infection.** To approximate the infected rate, we used the model scenario in our calculations to simplify our estimation of the infected rate. The realistic scenario is only a representation and not a precise depiction of the COVID-19 infected rate in Wuhan.

| Country   | Patient Number | Flight Date | Confirmation Date | References |
|-----------|----------------|-------------|-------------------|------------|
| Japan     | 1              | 1/6/2020    | 1/15/2020         | 1          |
| Japan     | 2              | 1/19/2020   | 1/24/2020         | 2          |
| Japan     | 3              | 1/18/2020   | 1/25/2020         | 3          |
| Japan     | 4              | 1/22/2020   | 1/26/2020         | 4          |
| Japan     | 5              | 1/20/2020   | 1/28/2020         | 5          |
| Japan     | 7              | 1/21/2020   | 1/28/2020         | 6          |
| Japan     | 10             | 1/13/2020   | 1/30/2020         | 7          |
| Japan     | 11             | 1/20/2020   | 1/30/2020         | 8          |
| Japan     | 12             | 1/22/2020   | 1/30/2020         | 9          |
| Japan     | 17             | 1/21/2020   | 2/4/2020          | 10         |
| Japan     | 19             | 1/22/2020   | 2/4/2020          | 11         |
| Japan     | 20             | 1/21/2020   | 2/5/2020          | 12         |
| Singapore | 1              | 1/20/2020   | 1/23/2020         | 13         |
| Singapore | 2              | 1/21/2020   | 1/24/2020         | 14         |
| Singapore | 3              | 1/20/2020   | 1/24/2020         | 14         |
| Singapore | 4              | 1/22/2020   | 1/25/2020         | 15         |
| Singapore | 5              | 1/18/2020   | 1/27/2020         | 16         |
| Singapore | 6              | 1/19/2020   | 1/28/2020         | 17         |
| Singapore | 7              | 1/23/2020   | 1/28/2020         | 17         |
| Singapore | 8              | 1/19/2020   | 1/29/2020         | 18         |
| Singapore | 9              | 1/19/2020   | 1/29/2020         | 18         |
| Singapore | 10             | 1/20/2020   | 1/29/2020         | 18         |
| Singapore | 11             | 1/22/2020   | 1/29/2020         | 19         |
| Singapore | 12             | 1/22/2020   | 1/29/2020         | 19         |
| Singapore | 13             | 1/21/2020   | 1/30/2020         | 19         |
| Singapore | 14             | 1/26/2020   | 1/30/2020         | 20         |
| Singapore | 16             | 1/22/2020   | 1/31/2020         | 20         |
| Singapore | 18             | 1/22/2020   | 2/1/2020          | 21         |
| Singapore | 26             | 1/21/2020   | 2/4/2020          | 22         |
| Korea     | 1              | 1/19/2020   | 1/20/2020         | 23         |
| Korea     | 2              | 1/22/2020   | 1/24/2020         | 24         |
| Korea     | 3              | 1/20/2020   | 1/26/2020         | 25         |
| Korea     | 4              | 1/20/2020   | 1/27/2020         | 26         |
| Korea     | 5              | 1/24/2020   | 1/30/2020         | 27         |
| Korea     | 7              | 1/23/2020   | 1/31/2020         | 28         |
| Korea     | 8              | 1/23/2020   | 1/31/2020         | 28         |
| Korea     | 15             | 1/20/2020   | 2/2/2020          | 29         |
| Korea     | 23             | 1/23/2020   | 2/6/2020          | 30         |
| Korea     | 26             | 1/31/2020   | 2/9/2020          | 31,32      |
| Korea     | 27             | 1/31/2020   | 2/9/2020          | 31,32      |

**Table S2. Exported Cases from China.** We looked at the flight dates of infected travelers from China to Japan, Singapore, and Korea before February 14<sup>th</sup>, 2020. These travelers do not include evacuees.

| Country     | Evacuees | Infected | 1st Evacuation Date | Infected Rate | References |
|-------------|----------|----------|---------------------|---------------|------------|
| Singapore   | 266      | 6        | 1/30/2020           | 2.26%         | 33         |
| Malaysia    | 107      | 2        | 2/4/2020            | 1.87%         | 34         |
| Italy       | 56       | 1        | 2/3/2020            | 1.79%         | 35         |
| Germany     | 124      | 2        | 1/31/2020           | 1.61%         | 36         |
| Japan       | 763      | 9        | 1/29/2020           | 1.18%         | 37         |
| UK          | 199      | 1        | 1/31/2020           | 0.50%         | 38         |
| US          | 800      | 3        | 1/29/2020           | 0.38%         | 39         |
| Korea       | 701      | 1        | 1/30/2020           | 0.14%         | 40         |
| Australia   | 500      | 0        | 2/4/2020            | 0.00%         | 41         |
| Vietnam     | 30       | 0        | 2/10/2020           | 0.00%         | 42         |
| Thailand    | 138      | 0        | 2/1/2020            | 0.00%         | 43         |
| India       | 647      | 0        | 2/1/2020            | 0.00%         | 44         |
| Philippines | 30       | 0        | 2/1/2020            | 0.00%         | 45         |
| Canada      | 398      | 0        | 2/6/2020            | 0.00%         | 46         |
| France      | 302      | 0        | 1/31/2020           | 0.00%         | 47         |
| Russia      | 140      | 0        | 2/5/2020            | 0.00%         | 48         |

**Table S3. Evacuees from Wuhan.** We compiled the number of evacuees and the number of infected evacuees from each country.

| Flight Date | Number of Evacuees | Infected | Infected Rate | References |
|-------------|--------------------|----------|---------------|------------|
| 1/29/2020   | 206                | 4        | 1.9%          | 37,49      |
| 1/30/2020   | 210                | 2        | 1.0%          | 37,50      |
| 1/31/2020   | 149                | 2        | 1.3%          | 37,51      |
| 2/7/2020    | 198                | 1        | 0.5%          | 37,52      |
| Total       | 763                | 9        | 1.2%          | 37         |

**Table S4. Japan’s Evacuations.** The first 4 evacuations to Japan were recorded with the number of evacuees and infected evacuees. Infected evacuee tested positive by RT-PCR for SARS-COV-2.

| Flight Date | Number of Passengers | Infected | Infected Rate | References |
|-------------|----------------------|----------|---------------|------------|
| 1/30/2020   | 92                   | 5        | 5.4%          | 53-56      |
| 2/9/2020    | 174                  | 1        | 0.6%          | 57         |

**Table S5. Singapore Evacuations.** The first 2 evacuations to Singapore were recorded with the number of evacuees and infected evacuees. Infected evacuee tested positive by RT-PCR for SARS-COV-2.

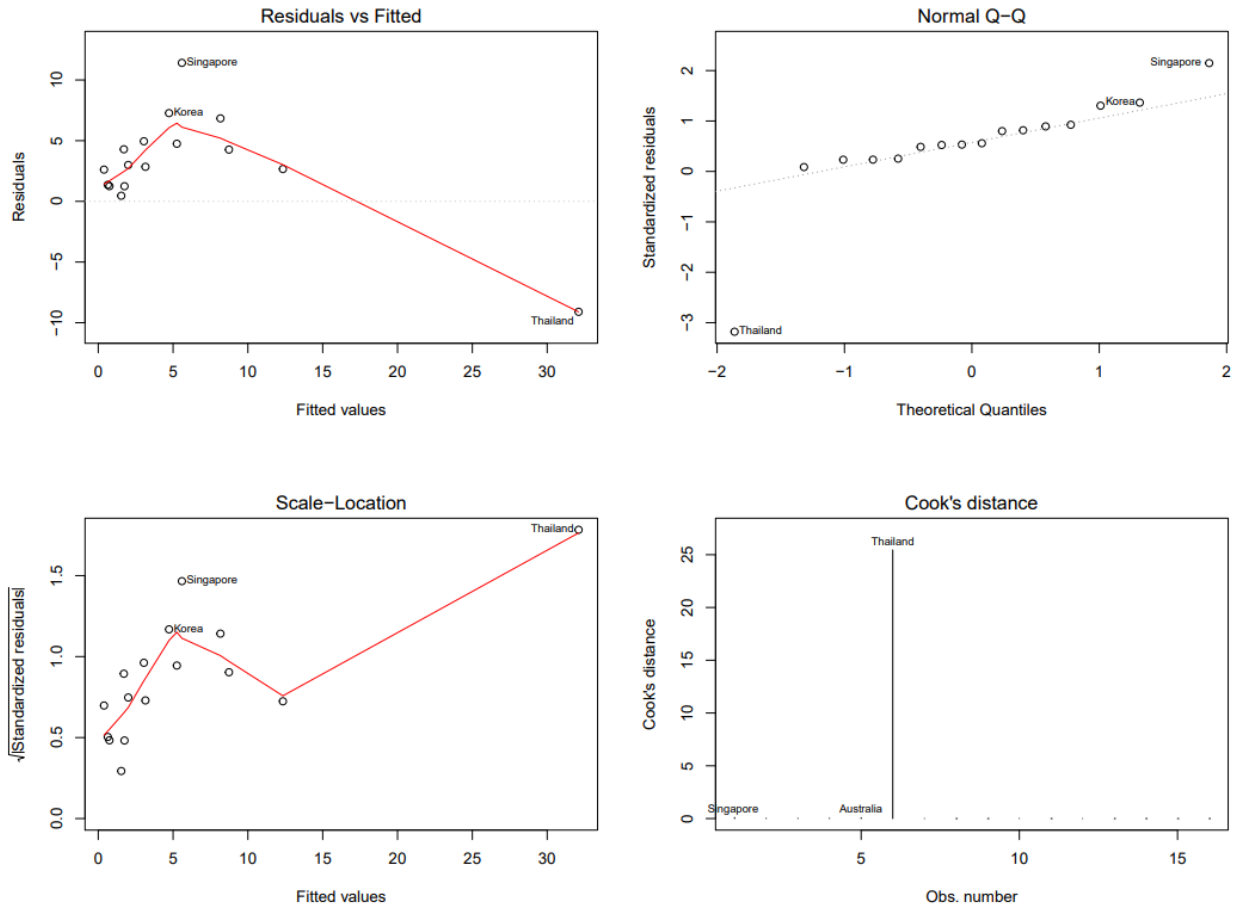

**Fig S2. Linear Regression Plots of Infected Traveler Model Including Thailand.** To test whether our model of infected travelers fit the four assumptions of linear regression model, we generated diagnostic plots to examine the fit of the line. Thailand appeared to be a significant outlier that we eventually chose to exclude because it appears to be discordant compared to the other points.

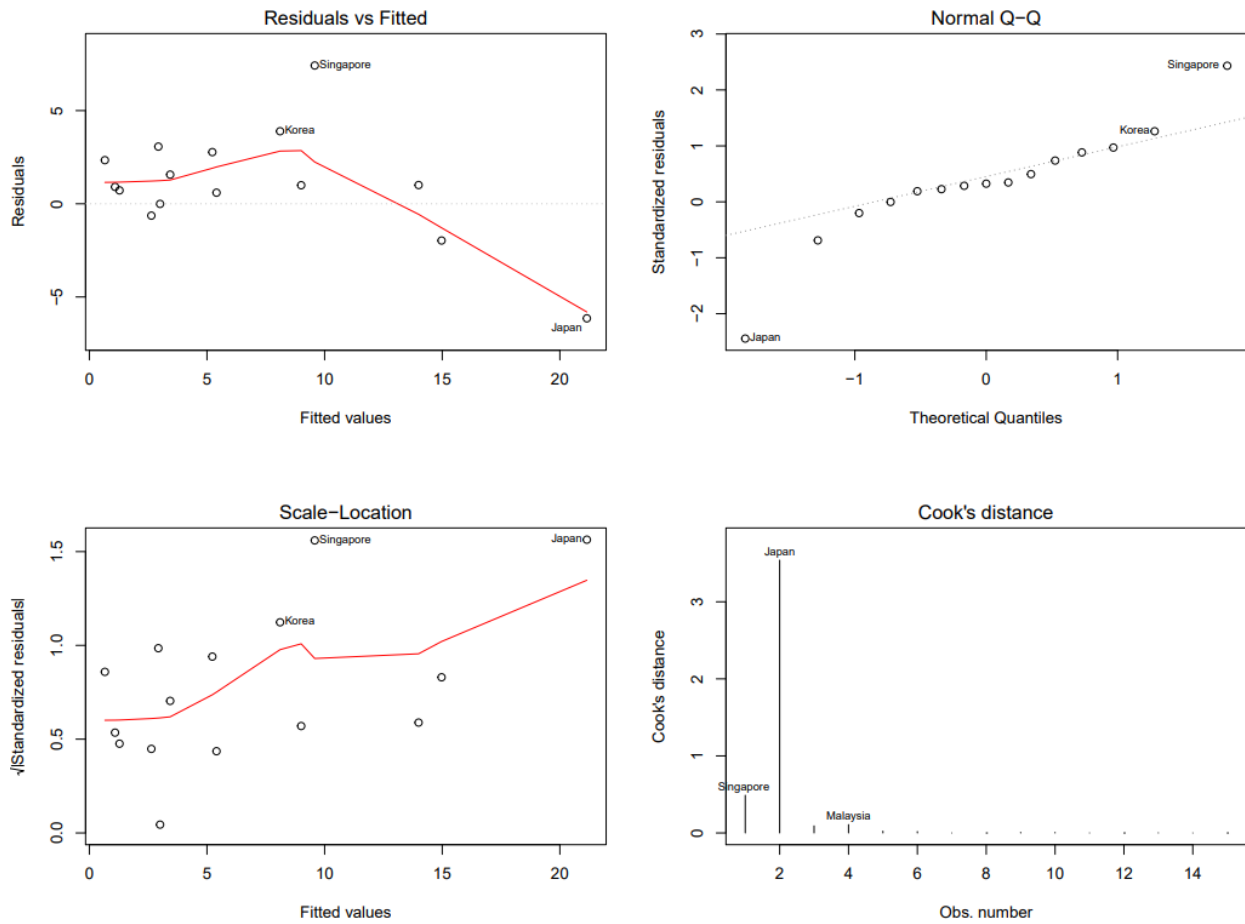

**Fig S3. Linear Regression Plots of Infected Traveler Model Excluding Thailand.** We also generated diagnostic plots to examine the fit of the linear regression without Thailand. We found that the fit was much better although Japan and Singapore appear to still deviate from the line significantly more than other countries. However, we believe data from both countries are valuable and should be included in the model. We believe a linear model is still appropriate after the diagnostic plots as the assumptions of linear regression have not been significantly violated.

## References

1. Outbreak of patients with pneumonia associated with new coronavirus (1st case): Japan Ministry of Health; 2020. Available from: [https://www.mhlw.go.jp/stf/newpage\\_08906.html](https://www.mhlw.go.jp/stf/newpage_08906.html).
2. Outbreak of patients with pneumonia associated with new coronavirus (2nd case): Japan Ministry of Health; 2020. Available from: [https://www.mhlw.go.jp/stf/newpage\\_09079.html](https://www.mhlw.go.jp/stf/newpage_09079.html).
3. Outbreak of patients with pneumonia associated with new coronavirus (3rd' case): Japan Ministry of Health; 2020. Available from: [https://www.mhlw.go.jp/stf/newpage\\_09099.html](https://www.mhlw.go.jp/stf/newpage_09099.html)
4. Outbreak of patients with pneumonia associated with new coronavirus (4th case): Japan Ministry of Health; 2020. Available from: [https://www.mhlw.go.jp/stf/newpage\\_09100.html](https://www.mhlw.go.jp/stf/newpage_09100.html)
5. Outbreak of patients with pneumonia associated with new coronavirus (5th case): Japan Ministry of Health; 2020. Available from: [https://www.mhlw.go.jp/stf/newpage\\_09154.html](https://www.mhlw.go.jp/stf/newpage_09154.html)
6. Outbreak of patients with pneumonia associated with new coronavirus (7th case): Japan Ministry of Health; 2020. Available from: [https://www.mhlw.go.jp/stf/newpage\\_09158.html](https://www.mhlw.go.jp/stf/newpage_09158.html)
7. Outbreak of patients with pneumonia associated with new coronavirus (10th case): Japan Ministry of Health; 2020. Available from: [https://www.mhlw.go.jp/stf/newpage\\_09236.html](https://www.mhlw.go.jp/stf/newpage_09236.html)
8. Outbreak of patients with pneumonia associated with new coronavirus (11 case): Japan Ministry of Health; 2020. Available from: [https://www.mhlw.go.jp/stf/newpage\\_09237.html](https://www.mhlw.go.jp/stf/newpage_09237.html)
9. Outbreak of patients with pneumonia associated with new coronavirus (12th case): Japan Ministry of Health; 2020. Available from: [https://www.mhlw.go.jp/stf/newpage\\_09239.html](https://www.mhlw.go.jp/stf/newpage_09239.html)
10. Outbreak of patients with pneumonia associated with new coronavirus (17th case): Japan Ministry of Health; 2020. Available from: [https://www.mhlw.go.jp/stf/newpage\\_09310.html](https://www.mhlw.go.jp/stf/newpage_09310.html)
11. Outbreak of patients with pneumonia associated with new coronavirus (19th case): Japan Ministry of Health; 2020. Available from: [https://www.mhlw.go.jp/stf/newpage\\_09312.html](https://www.mhlw.go.jp/stf/newpage_09312.html)
12. Outbreak of patients with pneumonia associated with new coronavirus (20th case): Japan Ministry of Health; 2020. Available from: [https://www.mhlw.go.jp/stf/newpage\\_09333.html](https://www.mhlw.go.jp/stf/newpage_09333.html)
13. CONFIRMED IMPORTED CASE OF NOVEL CORONAVIRUS INFECTION IN SINGAPORE; MULTI-MINISTRY TASKFORCE RAMPS UP PRECAUTIONARY MEASURES: Singapore Ministry of Health; 2020. Available from: <https://www.moh.gov.sg/news-highlights/details/confirmed-imported-case-of-novel->

[coronavirus-infection-in-singapore-multi-ministry-taskforce-ramps-up-precautionary-measures.](#)

14. TWO MORE CASES OF CONFIRMED IMPORTED CASE OF NOVEL CORONAVIRUS INFECTION IN SINGAPORE: Singapore Ministry of Health; 2020. Available from: <https://www.moh.gov.sg/news-highlights/details/two-more-cases-of-confirmed-imported-case-of-novel-coronavirus-infection-in-singapore>
15. FOURTH CONFIRMED IMPORTED CASE OF WUHAN CORONAVIRUS INFECTION IN SINGAPORE: Singapore Ministry of Health; 2020. Available from: <https://www.moh.gov.sg/news-highlights/details/fourth-confirmed-imported-case-of-wuhan-coronavirus-infection-in-singapore>
16. FIFTH CONFIRMED IMPORTED CASE OF WUHAN CORONAVIRUS INFECTION IN SINGAPORE: Singapore Ministry of Health; 2020. Available from: <https://www.moh.gov.sg/news-highlights/details/fifth-confirmed-imported-case-of-wuhan-coronavirus-infection-in-singapore-27Jan>
17. TWO MORE CONFIRMED IMPORTED CASES OF WUHAN CORONAVIRUS INFECTION IN SINGAPORE; 2020. Available from: <https://www.moh.gov.sg/news-highlights/details/two-more-confirmed-imported-cases-of-wuhan-coronavirus-infection-in-singapore>
18. THREE MORE CONFIRMED IMPORTED CASES OF WUHAN CORONAVIRUS INFECTION IN SINGAPORE: Singapore Ministry of Health; 2020. Available from: <https://www.moh.gov.sg/news-highlights/details/three-more-confirmed-imported-cases-of-wuhan-coronavirus-infection-in-singapore>
19. THREE MORE CONFIRMED IMPORTED CASES OF WUHAN CORONAVIRUS INFECTION IN SINGAPORE: Singapore Ministry of Health; 2020. Available from: <https://www.moh.gov.sg/news-highlights/details/three-more-confirmed-imported-cases-of-wuhan-coronavirus-infection-in-singapore-30Jan>
20. THREE MORE CONFIRMED IMPORTED CASES OF WUHAN CORONAVIRUS INFECTION IN SINGAPORE: Singapore Ministry of Health; 2020. Available from: <https://www.moh.gov.sg/news-highlights/details/three-more-confirmed-imported-cases-of-wuhan-coronavirus-infection-in-singapore-31-jan>
21. TWO MORE CONFIRMED IMPORTED CASES OF NOVEL CORONAVIRUS INFECTION IN SINGAPORE: Singapore Ministry of Health; 2020. Available from: <https://www.moh.gov.sg/news-highlights/details/two-more-confirmed-imported-cases-of-novel-coronavirus-infection-in-singapore>
22. FOUR MORE CONFIRMED CASES OF NOVEL CORONAVIRUS INFECTION IN SINGAPORE: Singapore Ministry of Health; 2020. Available from: <https://www.moh.gov.sg/news-highlights/details/four-more-confirmed-cases-of-novel-coronavirus-infection-in-singapore>
23. Confirmation of confirmed cases of new influx of new coronavirus in the quarantine phase Raise and respond to the infectious disease crisis alert to the 'attention' level: Korean Ministry of Health and Welfare; 2020. Available from: [http://www.mohw.go.kr/react/al/sal0301vw.jsp?PAR\\_MENU\\_ID=04&MENU\\_ID=0403&page=39&CONT\\_SEQ=352435](http://www.mohw.go.kr/react/al/sal0301vw.jsp?PAR_MENU_ID=04&MENU_ID=0403&page=39&CONT_SEQ=352435)



24. 24. New coronavirus confirmed as the second domestic patient: Korean Ministry of Health and Welfare; 2020. Available from: [http://www.mohw.go.kr/react/al/sal0301vw.jsp?PAR\\_MENU\\_ID=04&MENU\\_ID=0403&page=37&CONT\\_SEQ=352506](http://www.mohw.go.kr/react/al/sal0301vw.jsp?PAR_MENU_ID=04&MENU_ID=0403&page=37&CONT_SEQ=352506)
25. New coronavirus confirmed as the third patient in Korea: Korean Ministry of Health and Welfare; 2020. Available from: [http://www.mohw.go.kr/react/al/sal0301vw.jsp?PAR\\_MENU\\_ID=04&MENU\\_ID=0403&page=37&CONT\\_SEQ=352511](http://www.mohw.go.kr/react/al/sal0301vw.jsp?PAR_MENU_ID=04&MENU_ID=0403&page=37&CONT_SEQ=352511)
26. Current Status of New Coronaviruses in Korea: Korean Ministry of Health and Welfare; 2020. Available from: [http://www.mohw.go.kr/react/al/sal0301vw.jsp?PAR\\_MENU\\_ID=04&MENU\\_ID=0403&page=37&CONT\\_SEQ=352516](http://www.mohw.go.kr/react/al/sal0301vw.jsp?PAR_MENU_ID=04&MENU_ID=0403&page=37&CONT_SEQ=352516)
27. Confirmation of 2 additional patients with new coronavirus: Korean Ministry of Health and Welfare; 2020. Available from: [http://www.mohw.go.kr/react/al/sal0301vw.jsp?PAR\\_MENU\\_ID=04&MENU\\_ID=0403&page=36&CONT\\_SEQ=352575](http://www.mohw.go.kr/react/al/sal0301vw.jsp?PAR_MENU_ID=04&MENU_ID=0403&page=36&CONT_SEQ=352575)
28. New Coronavirus Domestic Outbreak Status Notice (January 31): Korean Ministry of Health and Welfare; 2020. Available from: [http://www.mohw.go.kr/react/al/sal0301vw.jsp?PAR\\_MENU\\_ID=04&MENU\\_ID=0403&page=36&CONT\\_SEQ=352609](http://www.mohw.go.kr/react/al/sal0301vw.jsp?PAR_MENU_ID=04&MENU_ID=0403&page=36&CONT_SEQ=352609)
29. Domestic occurrence of new coronavirus: Korean Ministry of Health and Welfare; 2020. Available from: [http://www.mohw.go.kr/react/al/sal0301vw.jsp?PAR\\_MENU\\_ID=04&MENU\\_ID=0403&page=35&CONT\\_SEQ=352642](http://www.mohw.go.kr/react/al/sal0301vw.jsp?PAR_MENU_ID=04&MENU_ID=0403&page=35&CONT_SEQ=352642)
30. Current status of new coronavirus in Korea (as of February 6): Korean Ministry of Health and Welfare; 2020. Available from: [http://www.mohw.go.kr/react/al/sal0301vw.jsp?PAR\\_MENU\\_ID=04&MENU\\_ID=0403&page=37&CONT\\_SEQ=352511](http://www.mohw.go.kr/react/al/sal0301vw.jsp?PAR_MENU_ID=04&MENU_ID=0403&page=37&CONT_SEQ=352511)
31. Domestic occurrence of new coronavirus infection (as of February 9): Korean Ministry of Health and Welfare; 2020. Available from: [http://www.mohw.go.kr/react/al/sal0301vw.jsp?PAR\\_MENU\\_ID=04&MENU\\_ID=0403&page=33&CONT\\_SEQ=352786](http://www.mohw.go.kr/react/al/sal0301vw.jsp?PAR_MENU_ID=04&MENU_ID=0403&page=33&CONT_SEQ=352786)
32. Domestic occurrence of new coronavirus infection (as of February 9): Korean Ministry of Health and Welfare; 2020. Available from: [http://www.mohw.go.kr/react/al/sal0301vw.jsp?PAR\\_MENU\\_ID=04&MENU\\_ID=0403&page=33&CONT\\_SEQ=352783](http://www.mohw.go.kr/react/al/sal0301vw.jsp?PAR_MENU_ID=04&MENU_ID=0403&page=33&CONT_SEQ=352783)
33. Aravindan A. Singapore evacuating 174 on second flight from Wuhan: Reuter; 2020. Available from: <https://www.reuters.com/article/us-china-health-singapore/singapore-evacuating-174-on-second-flight-from-wuhan-idUSKBN2020EY>.
34. Four COVID-19 patients discharged in Malaysia, all evacuees from Wuhan complete quarantine: CNA; 2020. Available from: <https://www.channelnewsasia.com/news/asia/malaysia-covid-19-recover-evacuees-wuhan-complete-quarantine-12446820>.

35. Italian evacuee from Wuhan positive for novel coronavirus: Inquirer; 2020. Available from: <https://newsinfo.inquirer.net/1225850/italian-evacuee-from-wuhan-positive-for-novel-coronavirus>.
36. Coronavirus: German evacuation flight from China carried two infected people: dw.com; 2020. Available from: <https://www.dw.com/en/coronavirus-german-evacuation-flight-from-china-carried-two-infected-people/a-52229955>.
37. About the present situation of new coronavirus infectious disease and correspondence of Ministry of Health, Labor and Welfare (February 12, 2012 version): Japan Ministry of Health; 2020. Available from: [https://www.mhlw.go.jp/stf/newpage\\_09450.html](https://www.mhlw.go.jp/stf/newpage_09450.html).
38. Coronavirus: Fourth patient in UK diagnosed: BBC; 2020. Available from: <https://www.bbc.com/news/uk-51430654>.
39. Feuer W. CDC confirms 15th US coronavirus case, a Wuhan evacuee quarantined at Texas military base: CNBC; 2020. Available from: <https://www.cnbc.com/2020/02/13/cdc-confirms-15th-us-case-of-coronavirus-among-wuhan-evacuees-under-quarantine-at-texas-military-base.html>.
40. Chan-kyong P. Coronavirus: South Korean returnee from Wuhan tests positive, Malaysia confirms one more: SCMP; 2020. Available from: <https://www.scmp.com/news/asia/east-asia/article/3049516/coronavirus-south-korean-returnee-wuhan-tests-positive-countrys>.
41. Xiao B, Choahan N. Australians in Wuhan told no more evacuation flights planned out of coronavirus epicentre abc.au2020. Available from: <https://www.abc.net.au/news/2020-02-12/australian-citizens-wuhan-no-planned-evacuations-coronavirus/11955520>.
42. Plane brings 30 Vietnamese evacuees from Wuhan: Saigon Times; 2020. Available from: <https://english.thesaigontimes.vn/74601/plane-brings-30-vietnamese-evacuees-from-wuhan.html>.
43. Thepgumpanat P, Tanakasempipat P. Thailand evacuates 138 from virus-hit Wuhan: Reuters; 2020. Available from: <https://www.reuters.com/article/us-china-health-thailand/thailand-evacuates-138-from-virus-hit-wuhan-idUSKBN1ZY0ZF>.
44. Indian envoy describes evacuation of Indians from virus-hit Wuhan a logistical nightmare: economictimes.indiatimes; 2020. Available from: <https://economictimes.indiatimes.com/news/international/world-news/indian-envoy-describes-evacuation-of-indians-from-virus-hit-wuhan-a-logistical-nightmare/articleshow/74067472.cms>.
45. Philippines evacuates 30, including infant, from virus-hit Wuhan: Reuters; 2020. Available from: <https://www.reuters.com/article/us-china-health-philippines/philippines-evacuates-30-including-infant-from-virus-hit-wuhan-idUSKBN20304F>.
46. Jackson H. 2nd evacuation flight chartered by Ottawa leaves Wuhan with 185 on board: Global News; 2020. Available from: <https://globalnews.ca/news/6530909/coronavirus-quarantine-flight-crew-released/>.
47. 36 evacuated from China to France show virus symptoms: minister: France24; 2020. Available from: <https://www.france24.com/en/20200203-36-evacuated-from-china-to-france-show-virus-symptoms-minister>.

48. Russia's strangest reality show: Siberian quarantine videos shared on Instagram: The Guardian; 2020. Available from: <https://www.theguardian.com/world/2020/feb/06/we-dont-leave-our-rooms-russians-quarantined-in-siberia-take-to-instagram>.
49. About outbreak of subclinical pathogen carrier (\*) related to new coronavirus: Japan Ministry of Health; 2020. Available from: [https://www.mhlw.go.jp/stf/newpage\\_09273.html](https://www.mhlw.go.jp/stf/newpage_09273.html)
50. About the test results of returning Japanese people on charter flights related to the new coronavirus: Japan Ministry of Health; 2020. Available from: [https://www.mhlw.go.jp/stf/newpage\\_09202.html](https://www.mhlw.go.jp/stf/newpage_09202.html)
51. Outbreaks of new coronavirus-related patients (14th and 15th cases) and asymptomatic pathogen carriers (\*): Japan Ministry of Health; 2020. Available from: [https://www.mhlw.go.jp/stf/newpage\\_09278.html](https://www.mhlw.go.jp/stf/newpage_09278.html)
52. Status of Japanese returnees on charter flights related to the new coronavirus: Japan Ministry of Health; 2020. Available from: [https://www.mhlw.go.jp/stf/newpage\\_09395.html](https://www.mhlw.go.jp/stf/newpage_09395.html)
53. THREE MORE CONFIRMED IMPORTED CASES OF WUHAN CORONAVIRUS INFECTION IN SINGAPORE: Singapore Ministry of Health; 2020. Available from: <https://www.moh.gov.sg/news-highlights/details/three-more-confirmed-imported-cases-of-wuhan-coronavirus-infection-in-singapore-31-jan>
54. TWO MORE CONFIRMED IMPORTED CASES OF NOVEL CORONAVIRUS INFECTION IN SINGAPORE: Singapore Ministry of Health; 2020. Available from: <https://www.moh.gov.sg/news-highlights/details/two-more-confirmed-imported-cases-of-novel-coronavirus-infection-in-singapore>
55. FOUR MORE CONFIRMED CASES OF NOVEL CORONAVIRUS INFECTION IN SINGAPORE: Singapore Ministry of Health; 2020. Available from: <https://www.moh.gov.sg/news-highlights/details/four-more-confirmed-cases-of-novel-coronavirus-infection-in-singapore>
56. ONE MORE CASE DISCHARGED; TWO NEW CASES OF NOVEL CORONAVIRUS INFECTION CONFIRMED: Singapore Ministry of Health; 2020. Available from: <https://www.moh.gov.sg/news-highlights/details/one-more-case-discharged-two-new-cases-of-novel-coronavirus-infection-confirmed-10feb>
57. FIVE MORE CASES DISCHARGED; TWO NEW CASES OF COVID-19 INFECTION CONFIRMED: Singapore Ministry of Health; 2020. Available from: <https://www.moh.gov.sg/news-highlights/details/five-more-cases-discharged-two-new-cases-of-covid-19-infection-confirmed>
